# Supplementary material for: Temperament and Home Environment Affect ADHD and Internalizing in Preschoolers
Source: Research Square preprint supplement (doi:10.21203/rs.3.rs-2124057/v1), 2022-10-10
Supplement: Supplementary file 1 [file 141e20835715667e872ffc43.docx]

Table S1

Estimates from Sensitivity Analyses [53]

| *df* = 97 |  | |  |  | |  |
| --- | --- | --- | --- | --- | --- | --- |
|  | Simple Slopes | |  | Simple Intercepts | |  |
| ADHD Behaviors |  |  |  |  |  |  |
|  | Unst. b | *z* | *p* | Unst. b | *z* | *p* |
| Low Effortful Control (-1SD) | 0.28 (.12) | 2.36 | .019 | 1.48 (.16) | 9.07 | < .0001 |
| Mean Effortful Control (x̅) | 0.06 (.11) | 0.53 | .595 | 1.28 (.12) | 10.45 | < .0001 |
| High Effortful Control (+1SD) | -0.16 (.17) | -0.97 | .332 | 1.07 (.16) | 6.88 | < .0001 |
|  |  |  |  |  |  |  |
| Internalizing Behaviors |  |  |  |  |  |  |
|  | Unst. b | *z* | *p* | Unst. b | *z* | *p* |
| Low Household Chaos (-1SD) | -0.38 (.18) | 2.13 | .033 | 1.24 (.19) | 6.59 | < .0001 |
| Mean Household Chaos (x̅) | -0.13 (.13) | 1.04 | .299 | 1.50 (.15) | 10.12 | < .0001 |
| High Household Chaos (+1SD) | 0.11 (.17) | 0.65 | .516 | 1.76 (.19) | 9.39 | < .0001 |


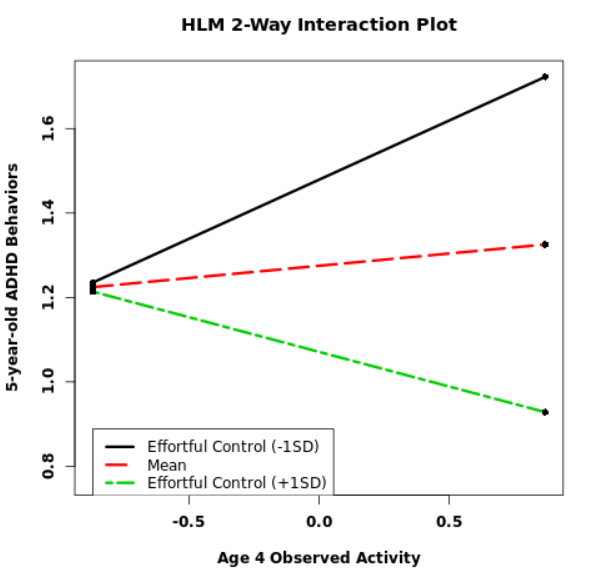

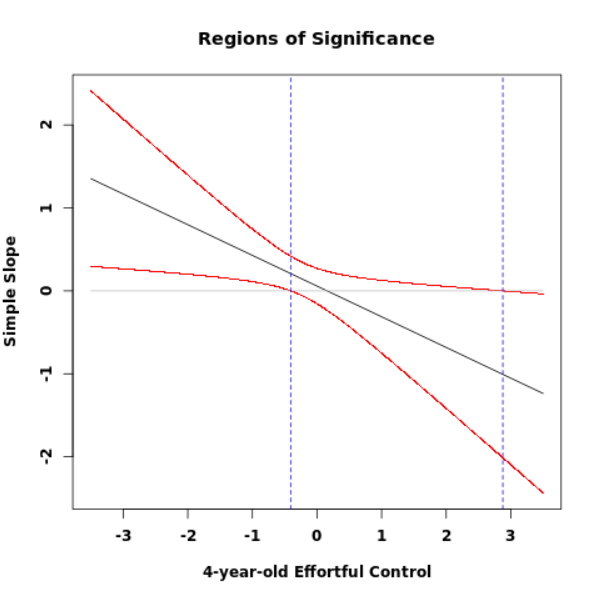


*Figure S1*. Simple slopes and regions of significance plots from the sensitivity analysis [53], indicating that 5-year-old ADHD behaviors significantly varied as a function of age 4 observed activity for children with 4-year-old temperamental effortful control scores *outside* the confidence bands (CBQec = -0.41 > *z* > 2.88 – i.e., approximately -1SD and lower and nearly +3SD and greater).


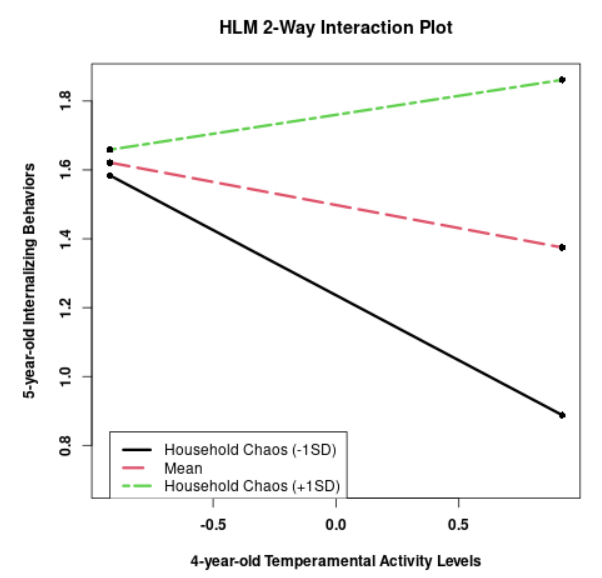

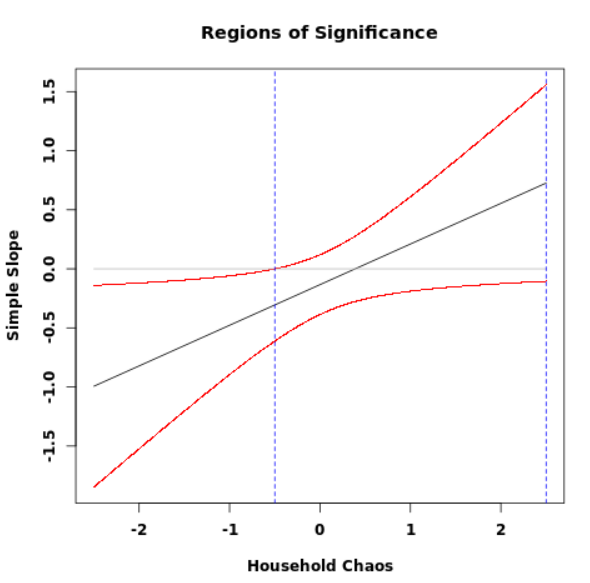


*Figure S2*. Simple slopes and regions of significance plots from the sensitivity analysis [53], indicating that 5-year-old internalizing behaviors significantly varied as a function of 4-year-old temperamental activity levels for children with household chaos scores *outside* the confidence bands (CHAOS = *z* < -0.50 – i.e., approximately -1SD below the mean and lower).
